# Supplementary material for: Sustainable synthesis and precise characterisation of bio-based star polycaprolactone synthesised with a metal catalyst and with lipase
Source: Royal Society of Chemistry journal article supplement (doi:10.1039/c8py01266k), 2018-01-01
Supplement: c8py01266k1.pdf [file c8py01266k1.pdf]

## Supporting Information

### **Sustainable Synthesis and Precise Characterisation of Bio-based Star Polycaprolactone Synthesised with a Metal Catalyst and with Lipase**

Payal Baheti,<sup>a,b</sup> Olinda Gimello,<sup>a</sup> Cécile Bouilhac,<sup>a\*</sup> Patrick Lacroix-Desmazes,<sup>a</sup> Steven M. Howdle<sup>b\*</sup>

<sup>a</sup> ICGM, ENSCM, CNRS, Univ Montpellier, Montpellier, France

<sup>b</sup> School of Chemistry, University of Nottingham, University Park, Nottingham NG7 2RD, United Kingdom

\*Corresponding author e-mail: [cecile.bouilhac@umontpellier.fr](mailto:cecile.bouilhac@umontpellier.fr),  
[steve.howdle@nottingham.ac.uk](mailto:steve.howdle@nottingham.ac.uk)

#### **Instrumentation and characterisation techniques**

**Nuclear Magnetic Resonance (NMR) Spectroscopy.** <sup>1</sup>H NMR spectra were recorded at room temperature on a Bruker Avance spectrometer operating at 400 MHz in deuterated chloroform (CDCl<sub>3</sub>). The chemical shifts are given in part per million (ppm) and were referenced to the peak of residual CHCl<sub>3</sub> at  $\delta = 7.26$  ppm. Multiplicities are given as triplets (t) and multiplets (m). The number, length and molecular weight of the arms of star *D*-sorbitol PCL were quantified by <sup>31</sup>P NMR spectroscopy after phosphitylation of the terminal hydroxy and carboxy groups. A stock solution was prepared by dissolving Chromium (III) acetylacetonate [Cr(acac)<sub>3</sub>] (11.9 mM, 25 mg) and cyclohexanol (17.7 mM, 10.6 mg, internal standard) in 6 ml pyridine : CDCl<sub>3</sub> (3:1 volume ratio). Known amounts of samples were dissolved in the stock solution (600  $\mu$ l), thus including 10.62  $\mu$ moles of internal standard ( $n_{IS}$ ) in each sample. The samples were vortexed until a clear purple solution was obtained. Subsequently, the phosphitylation reagent 2-chloro-4,4,5,5-tetramethyl-1,3,2-dioxaphospholane (Cl-TMDP) (60  $\mu$ l) was added dropwise, and the samples were left to react on a mechanical shaker at ambient temperature for 60 minutes. Inverse gated decoupled <sup>1</sup>H-<sup>31</sup>P NMR spectra were recorded on a Bruker Avance III at 162 MHz for <sup>31</sup>P using CDCl<sub>3</sub> as a

locking solvent with an elongated acquisition time (60 min), a 90° pulse angle, 30 s delay time, and 128 scans. The chemical shifts were referenced to  $\delta = 132.20$  ppm (H<sub>2</sub>O + Cl-TMDP adduct). <sup>31</sup>P NMR spectra without <sup>1</sup>H-<sup>31</sup>P decoupling were also recorded to investigate the multiplicity and chemical shifts corresponding to the derivatised functional groups (e.g. triplet for primary or doublet for secondary hydroxy groups).

**Size exclusion chromatography-multi-angle light scattering (SEC-MALS).** SEC measurements were performed on a <sup>SEC</sup>Agilent 1260 Infinity triple detection SEC comprising a Wyatt Optilab multi-angle light scattering (MALS) detector, an Agilent differential refractometer (RI). Separation was achieved using 2 PLgel mixed D columns (7.5 mm x 50 mm). The eluent was tetrahydrofuran (THF) at room temperature at a flow rate of 1 ml min<sup>-1</sup>. The refractive index increment ( $dn/dc$ ) of star *D*-sorbitol PCL was determined using a representative sample, star *D*-sorbitol-[(PCL)<sub>9,7</sub>-OH]<sub>5,1</sub> (Table 1, Entry 3). Five different concentrations of star *D*-sorbitol-[(PCL)<sub>9,7</sub>-OH]<sub>5,1</sub> in THF were injected and the resulting RI signals were plotted as a function of concentration. The  $dn/dc$  value of  $0.074 \pm 0.04$  mL g<sup>-1</sup> was obtained as the gradient of a linear fit using the ASTRA software, which is in good agreement with the  $dn/dc$  value from the literature for linear PCL in THF at 25 °C ( $dn/dc = 0.072$  mL g<sup>-1</sup>).<sup>1</sup> Therefore, this value ( $dn/dc = 0.072$  mL g<sup>-1</sup>) was used for MALS analysis of all samples in this work.

**Size exclusion chromatography for the Mark-Houwink Plot.** SEC measurements were performed employing refractive index and viscometer detectors on a 390-MSD Agilent system, the eluent was THF at 30°C and a flow rate of 1 mL min<sup>-1</sup>. Separation was achieved using 2 PLgel mixed D columns 5  $\mu$ m (300 × 7.5 mm) connected in series. The Universal

---

<sup>1</sup> Zhou, X. & Hong, L. Controlled ring-opening polymerization of cyclic esters with phosphoric acid as catalysts. *Colloid Polym. Sci.* **291**, 2155–2162 (2013).

Calibration approach was used to calculate the molecular weight average for the star-branched polymers using linear PS standards.

**Matrix Assisted Laser Desorption and Ionisation-Time of Flight Mass Spectrometry (MALDI-TOF MS).** MALDI TOF MS data were recorded on a Bruker RapiFlex spectrometer operating at the following conditions: Nitrogen laser (337 nm), accelerating potential (20 kV) in positive linear ion mode. Trans-2-[3-(4-*tert*-butylphenyl)-2-methyl-2-propenylidene]malononitrile (DCTB) was employed as the matrix. An analyte solution and matrix solution with a concentration of 10 g L<sup>-1</sup> in THF (1:4 v/v analyte-to-matrix solution) were mixed with 1 μL of potassium trifluoroacetate (10 g/L). 1 μL of the resulting mixture was spotted on the MALDI plate for MS analysis. Data were analysed and normalised using the FlexAnalysis version 3.0 (Bruker) software.

**Differential scanning calorimetry (DSC).** DSC analyses were performed on a Q2000 TA instrument calibrated with an indium standard under N<sub>2</sub> flow. In a standard experiment, the sample (2 – 5 mg) was placed in an aluminium pan with a blank reference pan in the instrument. DSC measurements were performed in a temperature range from -80 to 100 °C at a heating/cooling rate of 10 °C min<sup>-1</sup>. The crystallisation temperature ( $T_c$ ) and the melting temperature ( $T_m$ ) were taken from the second cycle.

**Table S1.** The polymerisation of  $\epsilon$ -CL using polyols as initiators and  $\text{Sn}(\text{Oct})_2$  as the catalyst in the bulk.

| Entry | I <sup>a</sup> | $M_n^{\text{targ. b}}$<br>(kg mol <sup>-1</sup> ) | T<br>(°C) | t<br>(h) | <sup>1</sup> H NMR       |                                |                                                            | SEC-MALS                                                                             |                        | SEC-<br>MALS/<br>NMR                      |
|-------|----------------|---------------------------------------------------|-----------|----------|--------------------------|--------------------------------|------------------------------------------------------------|--------------------------------------------------------------------------------------|------------------------|-------------------------------------------|
|       |                |                                                   |           |          | Conv <sup>c</sup><br>(%) | $DP_n^{\text{NMR d}}$<br>(arm) | $M_n^{\text{H-NMR d}}$<br>(arm)<br>(kg mol <sup>-1</sup> ) | $M_n^{\text{SEC-MALS}}$<br>(star<br>polymer) <sup>e</sup><br>(kg mol <sup>-1</sup> ) | $\bar{D}$ <sup>e</sup> | $N_{\text{arms}}^{\text{SEC-MALS/NMR f}}$ |
| 1     | HexD           | 1                                                 | 95        | 1        | 97                       | 4.9                            | 0.50                                                       | 1.00                                                                                 | 1.04                   | 2.0                                       |
| 2     | HexD           | 6                                                 | 95        | 6.5      | 83                       | 17.3                           | 1.97                                                       | 3.73                                                                                 | 1.04                   | 2.0                                       |
| 3     | HexD           | 6                                                 | 140       | 1        | 98                       | 23.6                           | 2.70                                                       | 5.90                                                                                 | 1.07                   | 2.0                                       |
| 4     | Gly            | 6                                                 | 140       | 3        | 98                       | 20.4                           | 2.30                                                       | 5.90                                                                                 | 1.03                   | 2.6                                       |
| 5     | PenE           | 6                                                 | 140       | 4        | 99                       | 15.9                           | 1.82                                                       | 5.80                                                                                 | 1.08                   | 3.2                                       |
| 6     | TriG           | 6                                                 | 140       | 9        | 99                       | 10.9                           | 1.24                                                       | 5.60                                                                                 | 1.04                   | 4.5                                       |
| 7     | <i>D</i> -Sorb | 6                                                 | 140       | 10.5     | 97                       | 9.7                            | 1.10                                                       | 5.60                                                                                 | 1.03                   | 5.1                                       |

<sup>a</sup> M: Monomer ( $\epsilon$ -CL), I : initiator (1,6-hexanediol (HexD), glycerol (Gly), pentaerythritol (PenE), triglycerol (TriG), *D*-sorbitol (*D*-Sorb)) and C: Catalyst ( $\text{Sn}(\text{Oct})_2$ ) is 0.1 mole with respect to the initiator.

<sup>b</sup>  $M_n^{\text{targ.}} = [\text{M}]:[\text{I}] \times M_{\epsilon\text{-CL}}$  at 100 % monomer conversion. <sup>c</sup> Monomer conversion determined by <sup>1</sup>H NMR. <sup>d</sup> Degree of polymerisation and average molecular weight of arms determined by following Eq. (S1) and (S2) respectively. <sup>e</sup> Molecular weight and dispersity ( $\bar{D}$ ) determined by SEC-MALS. <sup>f</sup> Average number of arms estimated by SEC-MALS and <sup>1</sup>H NMR.

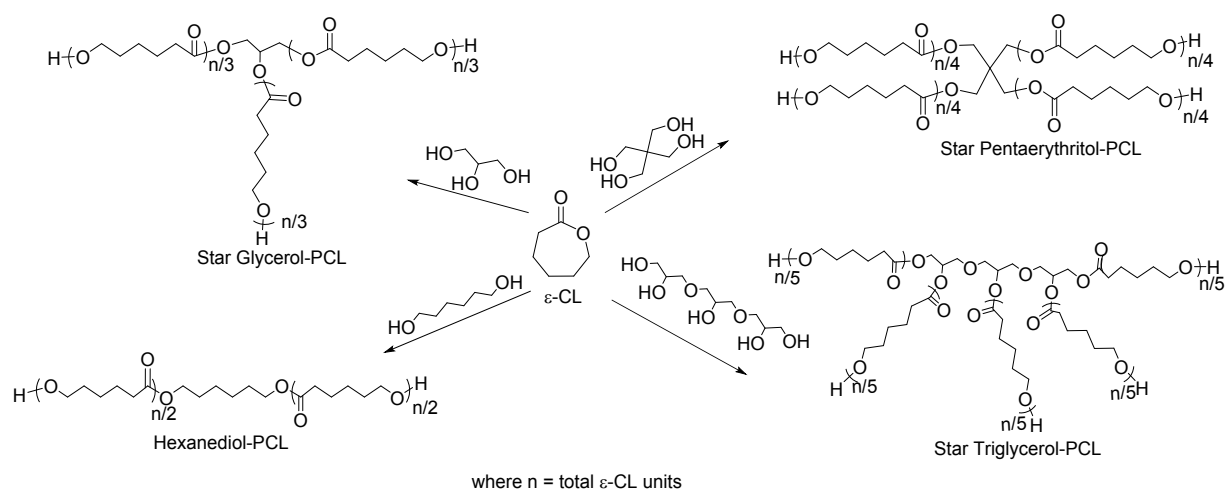

**Scheme S1.** ROP of  $\epsilon$ -caprolactone from polyols (1,6-hexanediol, glycerol, pentaerythritol, triglycerol) using  $\text{Sn}(\text{Oct})_2$  catalyst at 140 °C in the bulk to afford polyol-PCL with a variable number of PCL arms.

## Equations.

|                                               |                                                                                                                                                          |      |
|-----------------------------------------------|----------------------------------------------------------------------------------------------------------------------------------------------------------|------|
| $DP_n^{\text{NMR}} (\text{arm})$              | $= \int H_{a+b} / \int H_f$                                                                                                                              | (S1) |
| $M_n^{\text{H-NMR}} (\text{arm})$             | $= DP_n^{\text{NMR}} \times M_{\epsilon\text{-CL}}$<br>where $M_{\epsilon\text{-CL}}$ = molar mass of $\epsilon\text{-CL}$ (114.14 g mol <sup>-1</sup> ) | (S2) |
| $M_n^{\text{SEC-MALS}} (\text{star polymer})$ | From SEC-MALS using dn/dc of 0.072 mL g <sup>-1</sup>                                                                                                    | (S3) |
| $N_{\text{arms}}^{\text{SEC-MALS/NMR}}$       | $= M_n^{\text{SEC-MALS}} (\text{star polymer}) / M_n^{\text{H-NMR}} (\text{arm})$                                                                        | (S4) |
| Mark-Houwink                                  | $[\eta] = K \times M^\alpha$                                                                                                                             | (S5) |
| $M_n^{\text{P-NMR}} (\text{arm})$             | $= [m_s / n_{\text{PCL-OP}}] \times 1000$                                                                                                                | (S6) |
| $M_n^{\text{P-NMR}} (\text{star polymer})$    | $= M_n^{\text{P-NMR}} (\text{arm}) \times N_{\text{arms}}^{31\text{P}}$                                                                                  | (S7) |
| %COOH                                         | $= (\int_{\text{PCL-COOP}} / \int_{\text{PCL-OP}}) \times 100$                                                                                           | (S8) |
| $n_{\text{PCL-OP}}$                           | $= (n_{\text{IS}} \times \int_{\text{PCL-OP}}) / \int_{\text{IS}}$                                                                                       | (S9) |

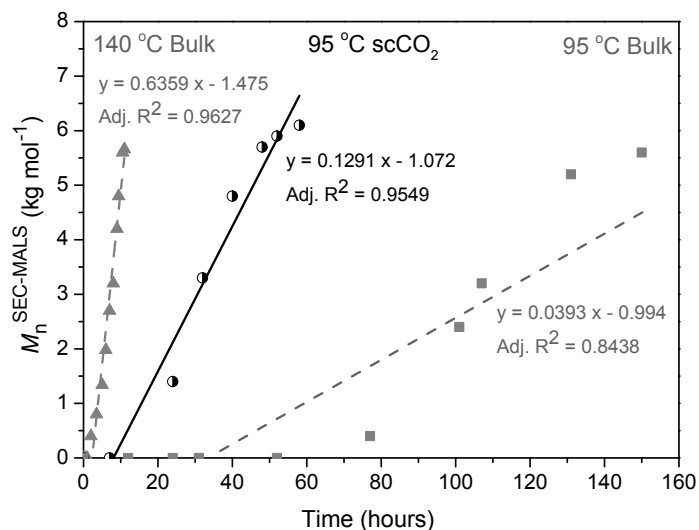

**Figure S1.** Evolution of  $M_n^{\text{SEC-MALS}}$  vs. time for the synthesis of star *D*-sorbitol-PCL catalysed by Sn(Oct)<sub>2</sub> in scCO<sub>2</sub> (95 °C, round symbols) or in the bulk (95 °C, grey square symbols and 140 °C, grey triangle symbols).

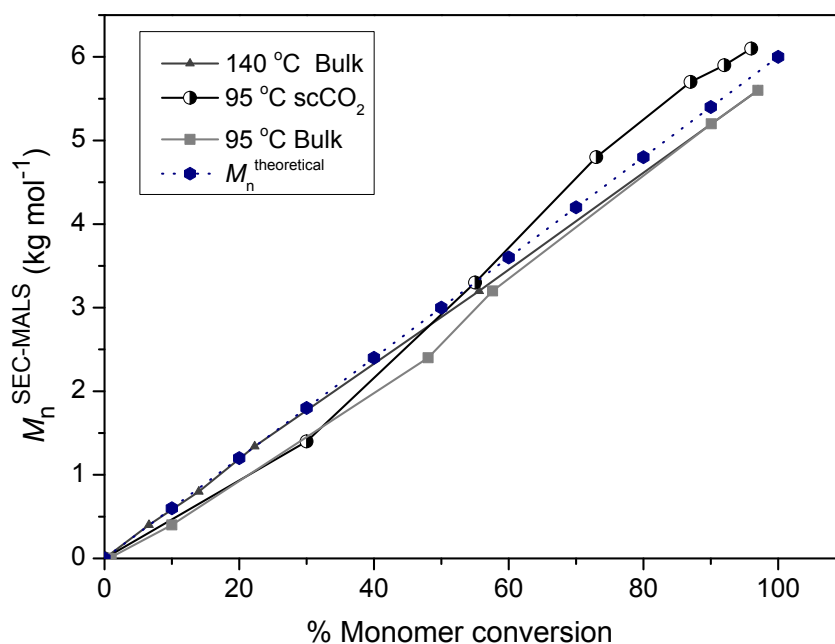

**Figure S2.** Evolution of molecular weight ( $M_n^{\text{SEC-MALS}}$ ) with monomer conversion for the synthesis of star *D*-sorbitol-PCL in the presence of Sn(Oct)<sub>2</sub>, in scCO<sub>2</sub> (95 °C) or in the bulk (95 °C, 140 °C). The theoretical molecular weight is included as well.

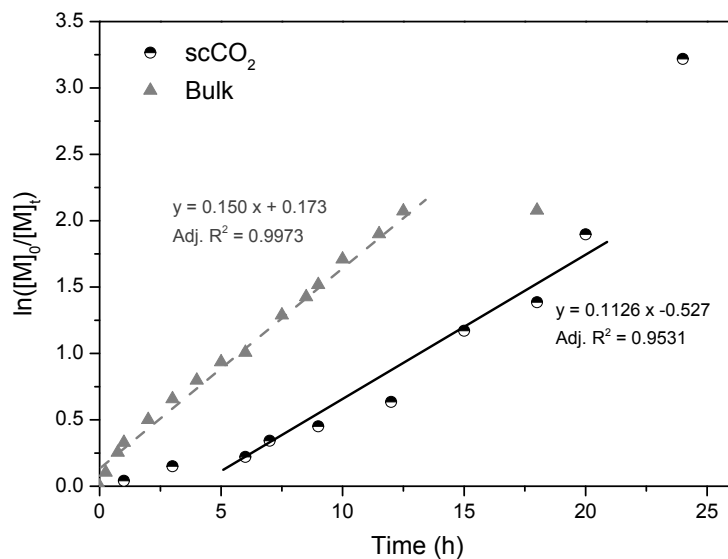

**Figure S3.** Evolution of  $\ln([M]_0/[M]_t)$  vs. time for the synthesis of star *D*-sorbitol-PCL catalysed by 3 wt% Novozym 435 relative to  $\epsilon$ -CL in the bulk (grey symbols) and in  $\text{scCO}_2$  (black symbols) at 60 °C.

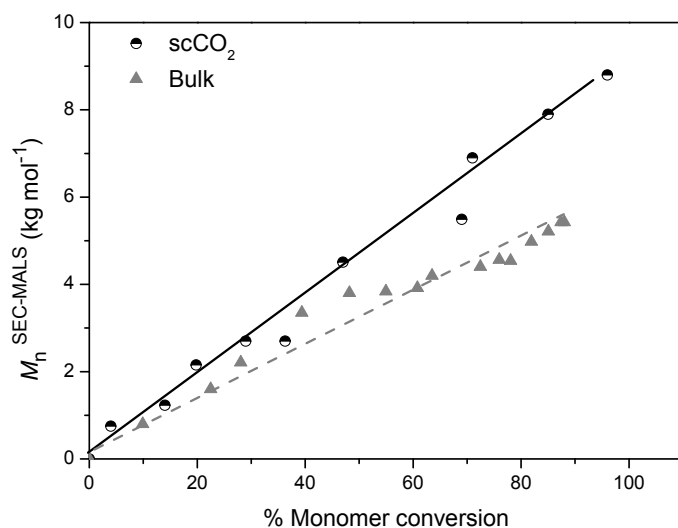

**Figure S4.** Evolution of  $M_n^{\text{SEC-MALS}}$  ( $\text{kg mol}^{-1}$ ) with increasing monomer conversion for the synthesis of star *D*-sorbitol-PCL catalysed by 3 wt% Novozym 435 in the bulk (grey symbols) and in  $\text{scCO}_2$  (black symbols) at 60 °C.

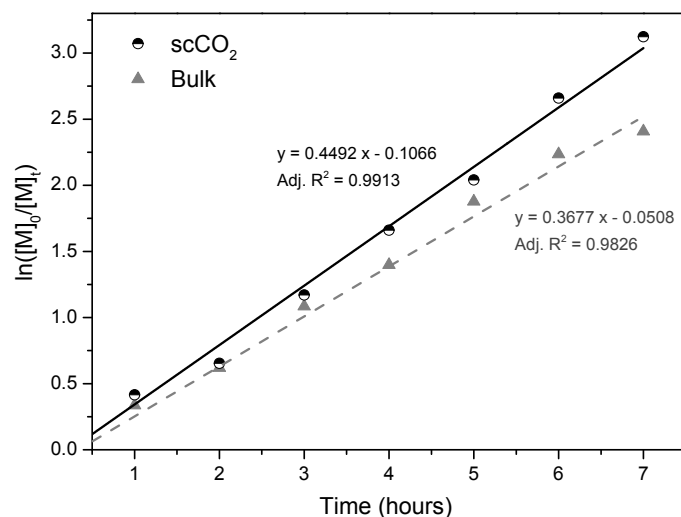

**Figure S5.** Evolution of  $\ln([M]_0/[M]_t)$  versus time for the synthesis of star *D*-sorbitol-PCL catalysed by 10 wt% Novozym 435 relative to  $\epsilon$ -CL in the bulk (grey symbols) and in  $\text{scCO}_2$  (black symbols) at 60 °C.

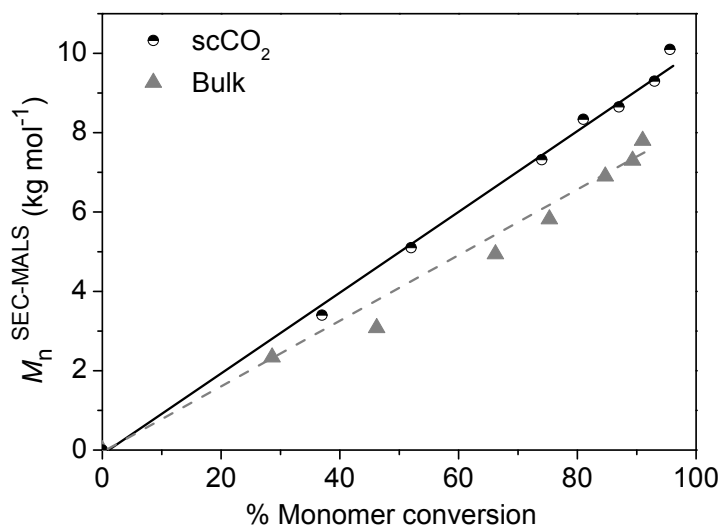

**Figure S6.** Evolution of  $M_n^{\text{SEC-MALS}}$  ( $\text{kg mol}^{-1}$ ) with increasing monomer conversion for the synthesis of star *D*-sorbitol-PCL catalysed by 10 wt% Novozym 435 in the bulk (grey symbols) and in  $\text{scCO}_2$  (black symbols) at 60 °C.



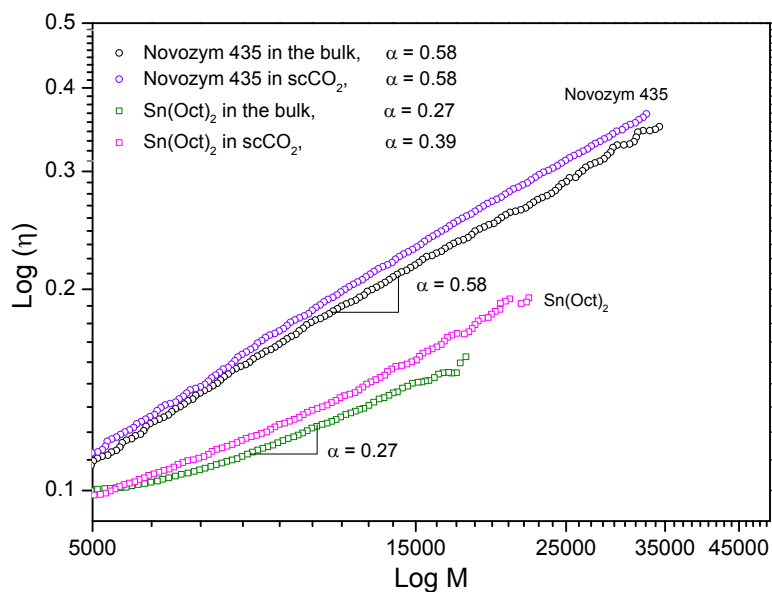

**Figure S7.** Intrinsic viscosity  $[\eta]$  as a function of the molar mass  $M$  for star  $D$ -sorbitol-PCL polymers catalysed by Novozym 435 in the bulk (black symbols) and in  $scCO_2$  (blue symbols) and of star  $D$ -sorbitol-PCL polymers catalysed by  $Sn(Oct)_2$  in the bulk (green symbols) and in  $scCO_2$  (pink symbols).

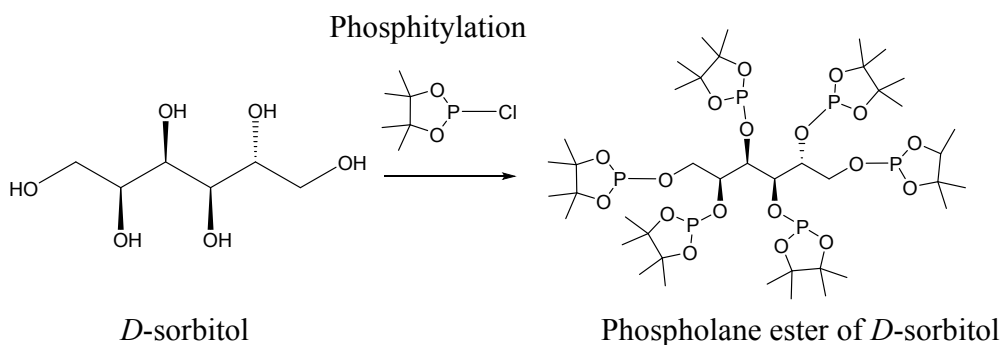

**Scheme S2.** Phosphitylation reaction of  $D$ -sorbitol by 2-chloro-4,4,5,5-tetramethyl-1,3,2-dioxaphospholane (Cl-TMDP).

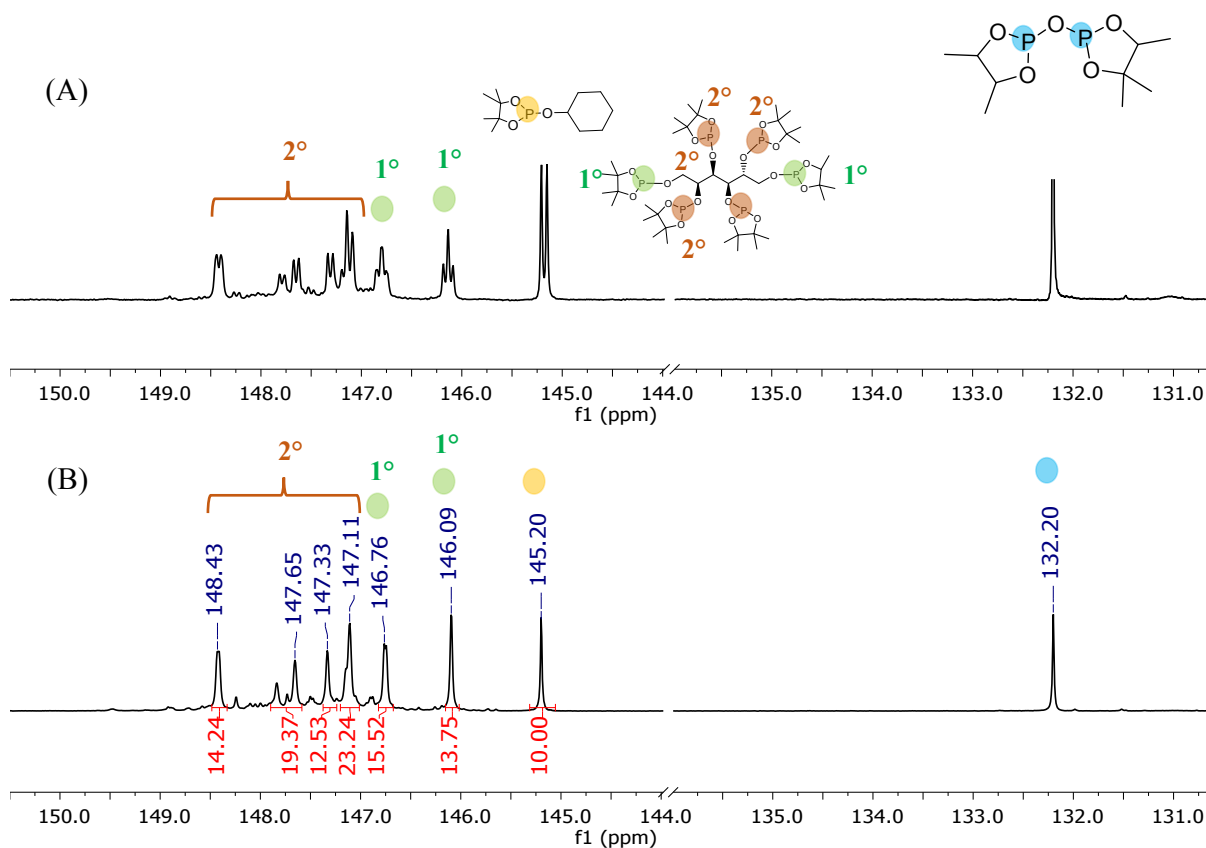

**Figure S8.**  $^{31}\text{P}$  NMR spectra of *D*-sorbitol derivatised by 2-chloro-4,4,5,5-tetramethyl-1,3,2-dioxaphospholane. (A)  $^{31}\text{P}$  NMR spectrum without decoupling, where the phospholane ester of the primary ( $1^\circ$ ) and secondary ( $2^\circ$ ) hydroxy group show triplet (●) and doublet (●) resonances, respectively. (B) The corresponding inverse gated decoupled  $^{31}\text{P}$  NMR spectrum used for quantification. IS: internal standard (cyclohexanol). Note that one would expect four  $2^\circ$  hydroxyl features, but there are additional peaks which clearly represent the presence of other minor species perhaps from less than fully quantitative phosphitylation of sorbitol.

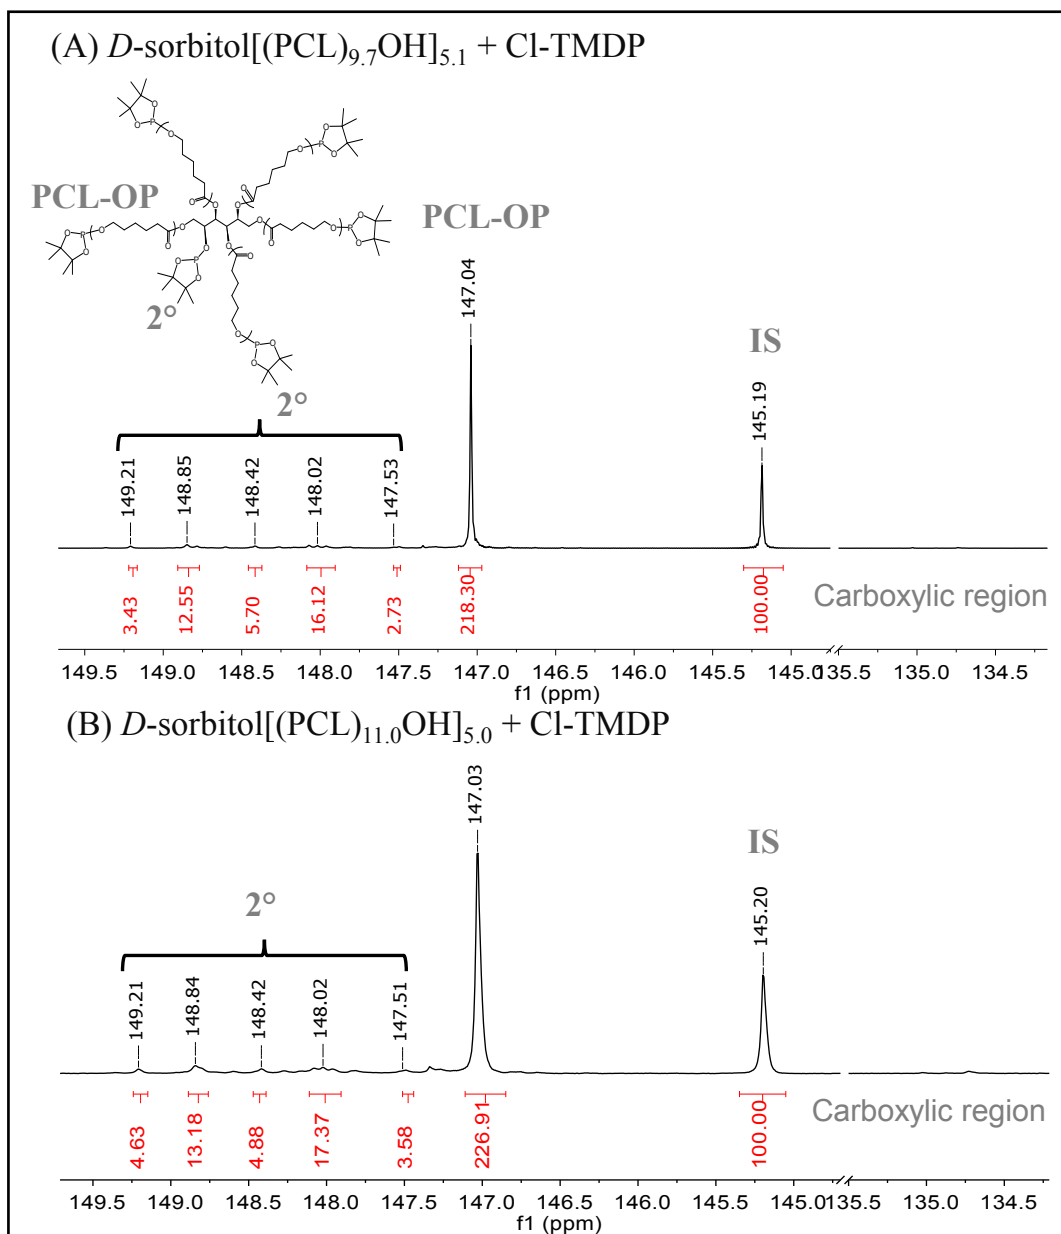

**Figure S9.** Inverse gated decoupled  $^{31}\text{P}$  NMR spectra of  $\text{Sn}(\text{Oct})_2$  catalysed star samples after phosphorylation by Cl-TMDP. (A) star  $D$ -sorbitol[(PCL)<sub>9,7</sub>OH]<sub>5,1</sub> synthesised in the bulk (Table 3, Entry 3) and (B) star  $D$ -sorbitol[(PCL)<sub>11,0</sub>OH]<sub>5,0</sub> in  $\text{scCO}_2$  (Table 3, Entry 4) using  $\text{Sn}(\text{Oct})_2$  as the catalyst. IS: internal standard (cyclohexanol).

**Table S2.** Analytical results from  $^{31}\text{P}$  NMR analysis of star *D*-sorbitol-PCL synthesised using Novozym 435 as the catalyst (Table 4 Entries 1-4).

| Sample (S) | Each Sample                         |                                   | $^{31}\text{P}$ NMR spectrum  |                                   | $^{31}\text{P}$ NMR calculation                    |                                                                           | $\int_{\text{COOP}}^{\text{f}}$ | %COOH (linear chains) $^{\text{g}}$ | $N_{\text{arms}} (^{31}\text{P})^{\text{h}}$ | $M_{\text{n}}^{\text{P-NMR}}$ (star polymer) $^{\text{i}}$ |
|------------|-------------------------------------|-----------------------------------|-------------------------------|-----------------------------------|----------------------------------------------------|---------------------------------------------------------------------------|---------------------------------|-------------------------------------|----------------------------------------------|------------------------------------------------------------|
|            | $n_{\text{IS}}$ ( $\mu\text{mol}$ ) | $m_{\text{s}}$ $^{\text{a}}$ (mg) | $\int_{\text{IS}}^{\text{b}}$ | $\int_{\text{PCL-OP}}^{\text{c}}$ | $n_{\text{PCL-OP}}^{\text{d}}$ ( $\mu\text{mol}$ ) | $M_{\text{n}}^{\text{P-NMR}}$ (arm) $^{\text{e}}$ ( $\text{g mol}^{-1}$ ) |                                 |                                     |                                              |                                                            |
| Entry 1    | 10.6                                | 25.7                              | 100                           | 121.2                             | 12.8                                               | 2000                                                                      | 1.73                            | 1.4                                 | 3.1                                          | 6200                                                       |
| Entry 2    | 10.7                                | 25.5                              | 100                           | 73.68                             | 7.88                                               | 3200                                                                      | 3.86                            | 5.2                                 | 3.3                                          | 10600                                                      |
| Entry 3    | 10.8                                | 26.3                              | 100                           | 81.39                             | 8.79                                               | 3000                                                                      | 4.42                            | 5.4                                 | 3.2                                          | 9600                                                       |
| Entry 4    | 10.4                                | 26.0                              | 100                           | 86.39                             | 8.98                                               | 2900                                                                      | 9.74                            | 11.3                                | 2.9                                          | 8400                                                       |

$^{\text{a}}$  Mass of the sample ( $m_{\text{s}}$ ) used for derivatisation with Cl-TMDP and subsequent NMR analysis.  $^{\text{b}}$  Integral corresponding to the resonance of internal standard ( $\delta = 147.04$  ppm).  $^{\text{c}}$  Integral of star sample relative to the IS.  $^{\text{d}}$  Moles of hydroxy groups determined by following Eq. (S9).  $^{\text{e}}$  Number average molecular weight of arms determined by following Eq. (S6).  $^{\text{f}}$  Integrals corresponding to COOH in the sample.  $^{\text{g}}$  Amount of linear PCL chains quantified by following Eq. (S8).  $^{\text{h}}$  Average number of arms determined by following Eq. (2).  $^{\text{i}}$  Molecular weight of star polymer determined by following Eq. (S7).

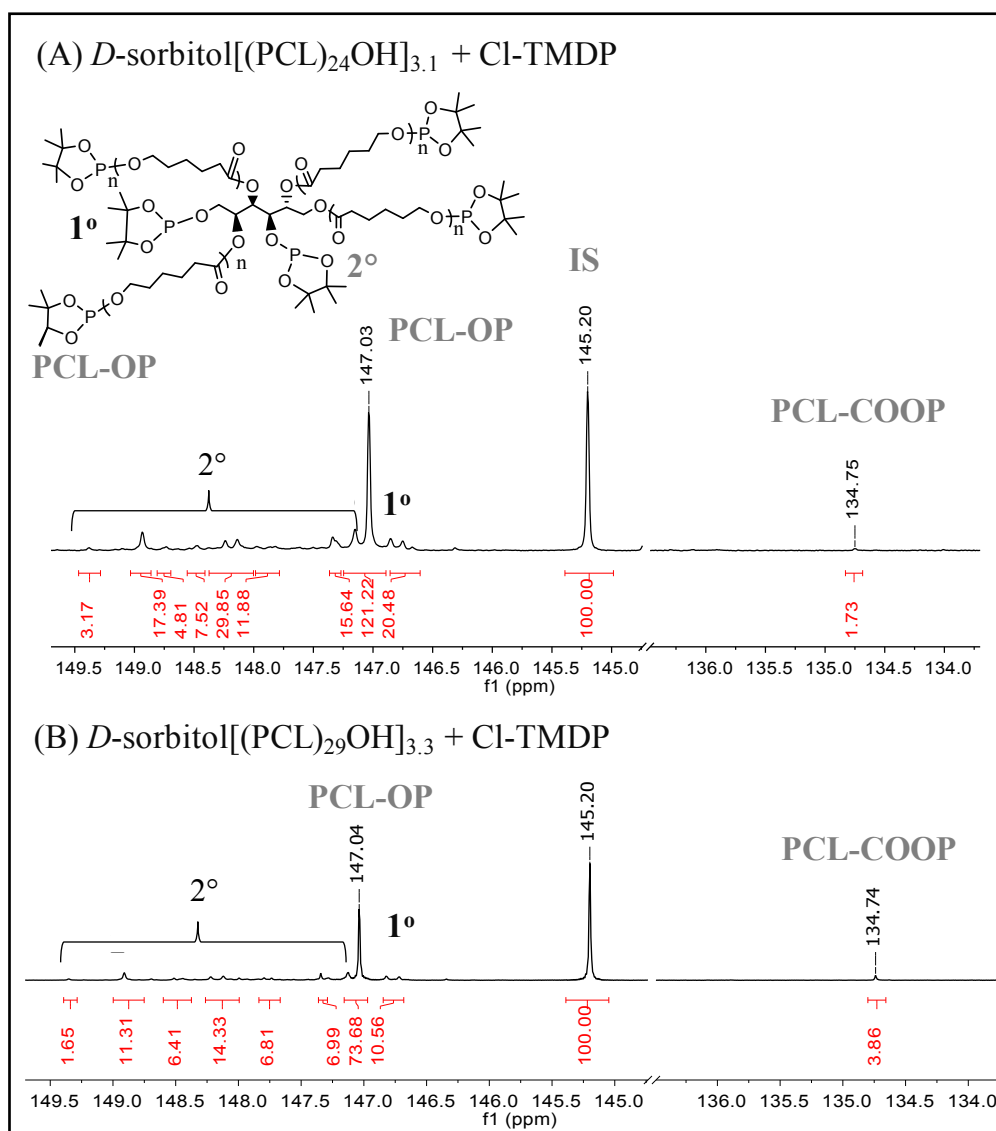

**Figure S10.** Inverse gated proton-decoupled <sup>31</sup>P NMR spectra after phosphitylation by Cl-TMDP. (A) star *D*-sorbitol[(PCL)<sub>24</sub>OH]<sub>3,1</sub> synthesised in the bulk using Novozym 435 (3 wt%) as the catalyst (Table 4 Entry 1 and Table S2 Entry 1) and (B) star *D*-sorbitol[(PCL)<sub>28</sub>OH]<sub>3,3</sub> synthesised in the bulk using Novozym 435 (10 wt%) as the catalyst (Table 4 Entry 2 and Table S2 Entry 2). IS: internal standard (cyclohexanol).

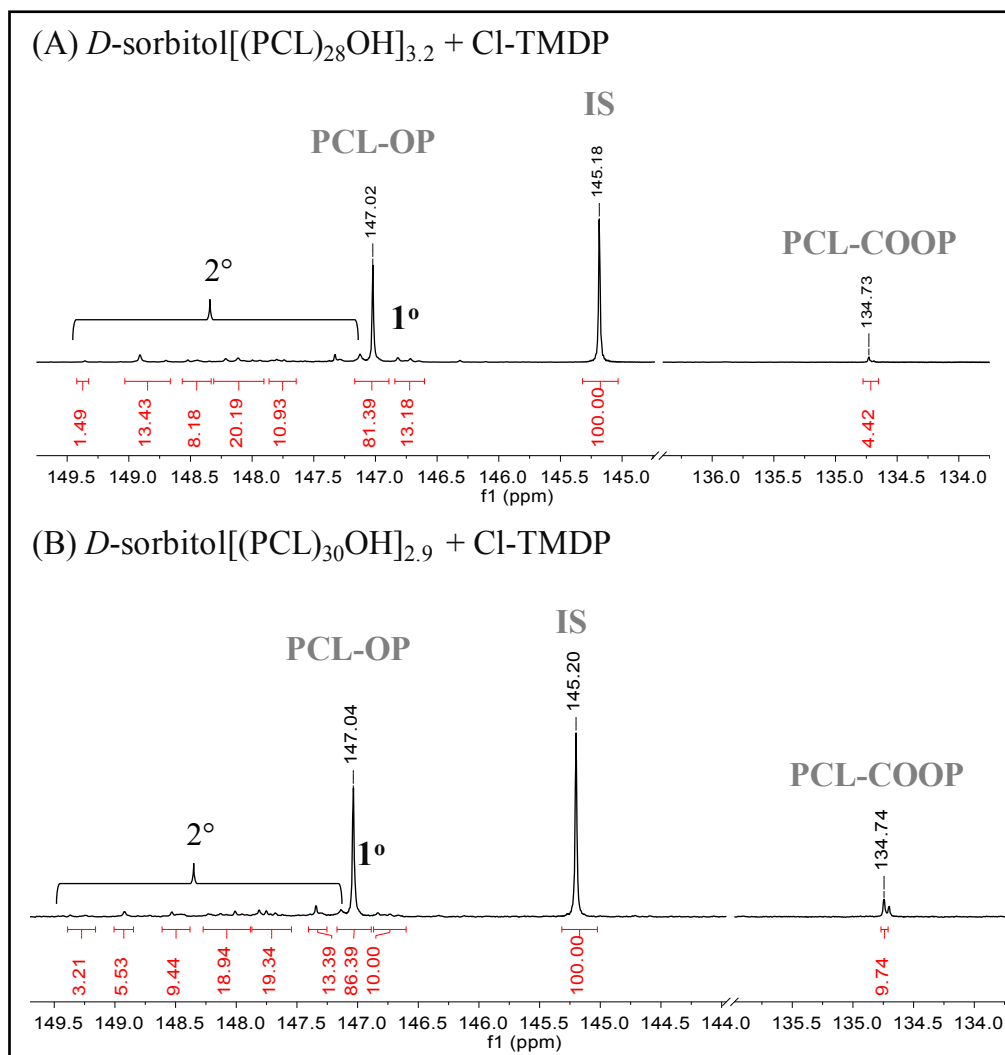

**Figure S11.** Inverse gated proton-decoupled  $^{31}\text{P}$  NMR spectrum after phosphitylation by Cl-TMDP. (A) star  $D$ -sorbitol[(PCL)<sub>28</sub>OH]<sub>3.2</sub> synthesised in  $\text{scCO}_2$  using Novozym 435 (3 wt%) (Table 4 Entry 3 and Table S2 Entry 3) and (B) star  $D$ -sorbitol[(PCL)<sub>30</sub>OH]<sub>2.9</sub> synthesised in  $\text{scCO}_2$  using Novozym 435 (10 wt%) (Table 4 Entry 4 and Table S2 Entry 4). IS: internal standard (cyclohexanol).

**Table S3.** DSC thermal analysis of star polyol-PCL of a variable number of arms catalysed by Sn(Oct)<sub>2</sub> and star *D*-sorbitol-PCL synthesised using Novozym.435.

| Sample <sup>a</sup>         | $M_n^{\text{SEC-MALS}}$                                | $N_{\text{arms}}$<br>( <sup>31</sup> P) <sup>c</sup> | $T_m$<br>(°C) <sup>d</sup> | $T_c$<br>(°C) <sup>d</sup> | $\Delta H$<br>(J/g) <sup>e</sup> |
|-----------------------------|--------------------------------------------------------|------------------------------------------------------|----------------------------|----------------------------|----------------------------------|
|                             | (star polymer) <sup>b</sup><br>(kg mol <sup>-1</sup> ) |                                                      |                            |                            |                                  |
| Hexanediol-PCL              | 5.90                                                   | 2.0                                                  | 45                         | 38                         | 68                               |
| Glycerol-PCL                | 5.90                                                   | 2.6                                                  | 43                         | 33                         | 40                               |
| Pentaerythritol-PCL         | 5.80                                                   | 3.0                                                  | 40                         | 32                         | 72                               |
| Triglycerol-PCL             | 5.60                                                   | 4.5                                                  | 38                         | 30                         | 68                               |
| <i>D</i> -Sorbitol-PCL      | 5.60                                                   | 5.1                                                  | 35                         | 24                         | 62                               |
| N435 <i>D</i> -Sorbitol-PCL | 5.65                                                   | 3.1                                                  | 42                         | 33                         | 72                               |
| N435 <i>D</i> -Sorbitol-PCL | 8.80                                                   | 3.2                                                  | 41                         | 31                         | 64                               |

<sup>a</sup> Polyol-PCL (polyol = hexanediol, glycerol, pentaerythritol, triglycerol, *D*-sorbitol) and N 435 (Novozym 435). <sup>b</sup> Molecular weight determined by SEC-MALS. <sup>c</sup> Average number of arms by phosphitylation. <sup>d</sup> Melting temperature and crystallisation temperature measured by DSC under nitrogen at a heating/cooling rate of 10 °C min<sup>-1</sup>. <sup>e</sup> Melting enthalpy measured by DSC.

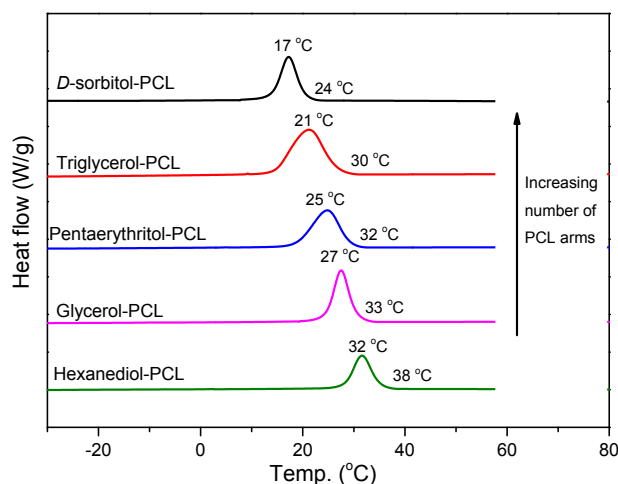

**Figure S12.** Comparison of DSC thermograms of polyol-PCL. The cooling scan from the melt after holding the sample at 120 °C for 10 min is shown.
